# Supplementary material for: Plasma polyacrylic acid and hollow TiO2 spheres modified with rhodamine B for sensitive electrochemical sensing Cu(ii)
Source: Royal Society of Chemistry journal article supplement (doi:10.1039/c5nj02483h), 2015-11-23
Supplement: c5nj02483h1.pdf [file c5nj02483h1.pdf]

## Supporting Information

### **Plasma polyacrylic acid and hollow TiO<sub>2</sub> spheres modified with rhodamine B for sensitively electrochemical sensing Cu(II)**

Zhihong Zhang<sup>a,b\*</sup>, Hongfei Ji<sup>b</sup>, Shuai Zhang<sup>a,b</sup>, Donglai Peng<sup>b</sup>, Qixuan Fu<sup>b</sup>, Minghua Wang<sup>b</sup>,

Linghao He<sup>b</sup>, Lingyu Yue<sup>a,b</sup>

<sup>1</sup>Henan Collaborative Innovation Center of Environmental Pollution Control and Ecological

Restoration,

<sup>2</sup>State Laboratory of Surface and Interface Science of Henan Province

Zhengzhou University of Light Industry, No. 166, Science Avenue, Zhengzhou 450001, P. R.

China

Corresponding author

\*E-mail addresses: mainzh@163.com

### 1. EIS Nyquist plot and equivalent circuit

The EIS spectrum was analyzed using Zview2 software. A nonlinear least-squares method was used to fit and determine the parameters of the elements in an equivalent circuit (**Fig. S1**). The Randles equivalent circuit, which consists of solution resistance ( $R_s$ ), charge-transfer resistance ( $R_{ct}$ ), constant-phase element (CPE), and Warburg impedance ( $W_o$ ), is shown in the inset of **Fig. S1**.

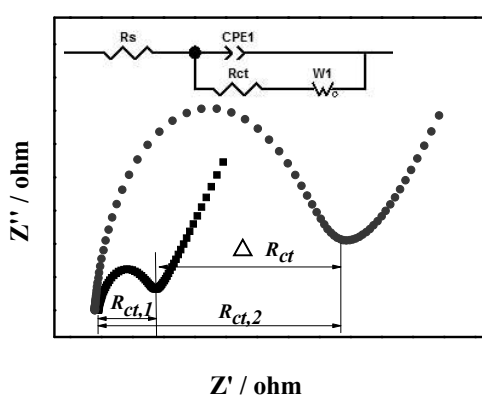

**Fig. S1** EIS Nyquist plots and equivalent circuit

### 2. The FT-IR spectra of $\text{TiO}_2$ @PPAA composite deposited at 20W

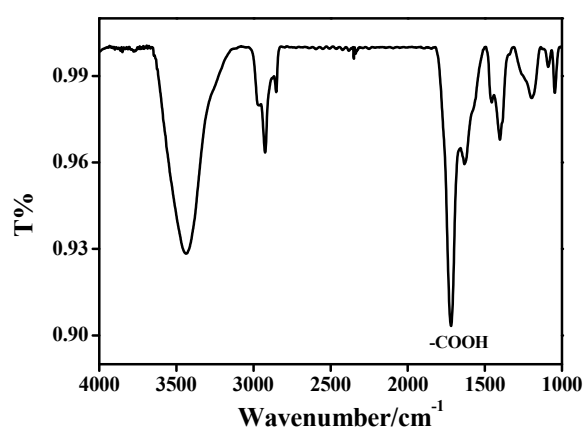

**Fig. S2** FT-IR spectra of  $\text{TiO}_2$ @PPAA nanocomposites deposited at 20 W for 1 min

### 3. The XPS spectra of $\text{TiO}_2$ @PPAA composite

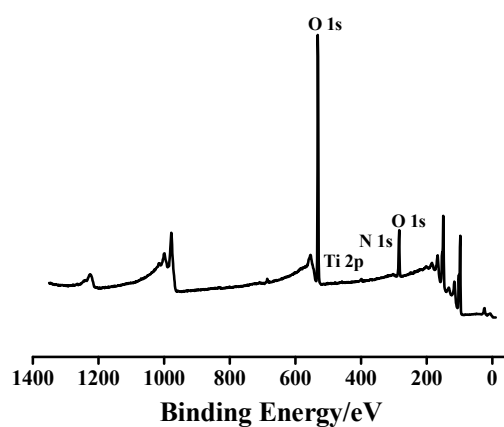

**Fig. S3** The survey scan spectra of  $\text{TiO}_2@\text{PPAA}$  composite deposited at 20 W for 1 min

**Table S1** Atomic percentage of  $\text{TiO}_2@\text{PPAA}$  composite for fabrication developed the sensor for detection of  $\text{Cu}^{2+}$

| Different steps                    | Atomic % |       |       |
|------------------------------------|----------|-------|-------|
|                                    | C 1s     | O 1s  | N 1s  |
| $\text{TiO}_2@\text{PPAA}$         | 32.6     | 64.69 | 2.14  |
| $\text{TiO}_2@\text{PPAA-EDC/NHS}$ | 69.92    | 13.13 | 16.95 |
| $\text{TiO}_2@\text{PPAA-RhB}$     | 52.4     | 44.53 | 3.07  |

**Table S2** The fitting values of the Randles Equivalent Circuit elements for the assembly process of *h*-TiO<sub>2</sub>@PPAA-RhB electrochemical sensor before and after the detection of Cu<sup>2+</sup>.

| Modified electrodes                                       | $R_s(\Omega)$ | $R_{et}(\Omega)$ | CPE( $\mu$ Mho)/n |
|-----------------------------------------------------------|---------------|------------------|-------------------|
| Au                                                        | 594.8         | 50.21            | 1.95/0.982        |
| <i>h</i> -TiO <sub>2</sub> /Au                            | 583.6         | 139.9            | 3.76/0.839        |
| <i>h</i> -TiO <sub>2</sub> @PPAA/Au                       | 533.3         | 426.8            | 5.52/0.80         |
| <i>h</i> -TiO <sub>2</sub> @PPAA-EDC-NHS/Au               | 533.2         | 354.2            | 66.38/0.563       |
| <i>h</i> -TiO <sub>2</sub> @PPAA-RhB/Au                   | 546.5         | 797.2            | 4.491/0.80        |
| <i>h</i> -TiO <sub>2</sub> @PPAA-RhB-Cu <sup>2+</sup> /Au | 554.4         | 1510             | 2.415/0.857       |

#### 4. The different developed sensor for detection $\text{Cu}^{2+}$

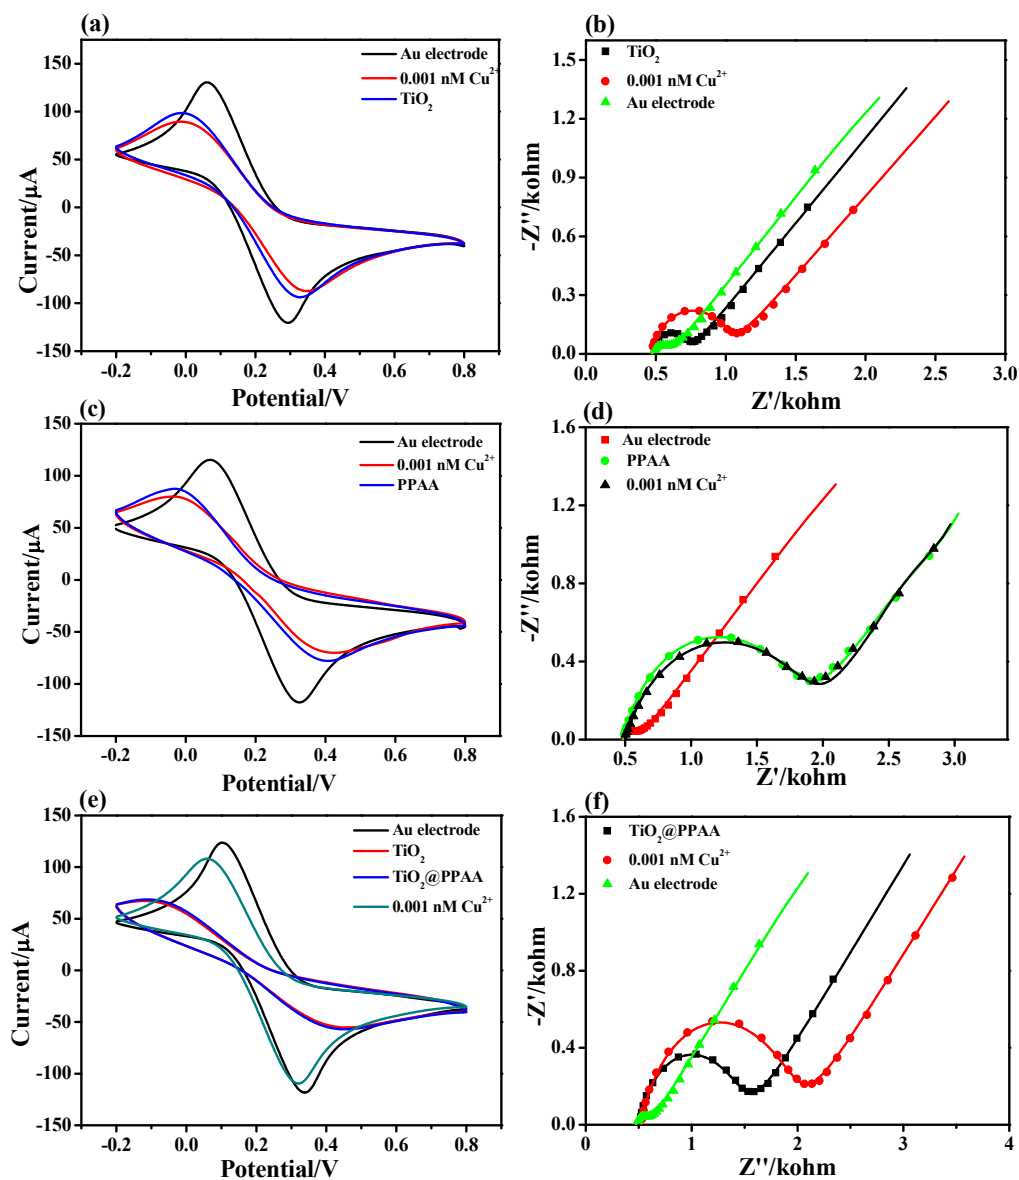

**Fig. S4** CV and Nyquist plots of  $h\text{-TiO}_2/\text{Au}$  (a-b), PPAA/Au (c-d) and  $h\text{-TiO}_2@\text{PPAA}$

(e-f) for directly detection of  $1 \text{ pM } \text{Cu}^{2+}$ .

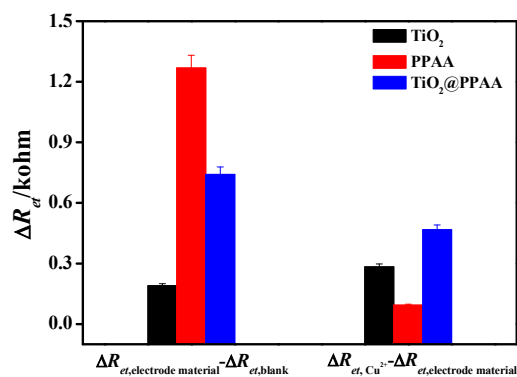

**Fig. S5** The values of  $\Delta R_{et}$  about the different modified electrodes with  $\text{TiO}_2$ , PPAA and  $\text{TiO}_2@PPAA$  toward the direct adsorption of  $\text{Cu}^{2+}$ , respectively.

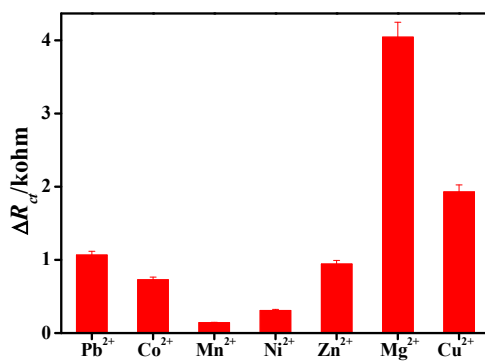

**Fig. S6** The values of  $\Delta R_{et}$  about the direct adsorption of  $\text{Pb}^{2+}$ ,  $\text{Co}^{2+}$ ,  $\text{Mn}^{2+}$ ,  $\text{Ni}^{2+}$ ,  $\text{Zn}^{2+}$ ,  $\text{Mg}^{2+}$ , and  $\text{Cu}^{2+}$  using the  $\text{TiO}_2@PPAA$  nanofilm as the electrode materials.
